# Supplementary material for: Complete loss of the MHC II pathway in an anglerfish, Lophius piscatorius
Source: Biol Lett. 2019 Oct 9;15(10):20190594. doi: 10.1098/rsbl.2019.0594 (PMC6832177; doi:10.1098/rsbl.2019.0594)
Supplement: Supplementary material [file rsbl20190594supp1.pdf]

**Electronic supplementary material from:**

**Complete loss of the MHC II pathway in an anglerfish, *Lophius piscatorius***

Arseny Dubin, Tor Erik Jørgensen, Truls Moum, Steinar Daae Johansen and Lars Martin Jakt

Genomics group, Faculty of Biosciences and Aquaculture, Nord University, 8049 Bodø, Norway

Author for correspondence:

Lars Martin Jakt

[lars.m.jakt@nord.no](mailto:lars.m.jakt@nord.no)

## S1. Assembly statistics

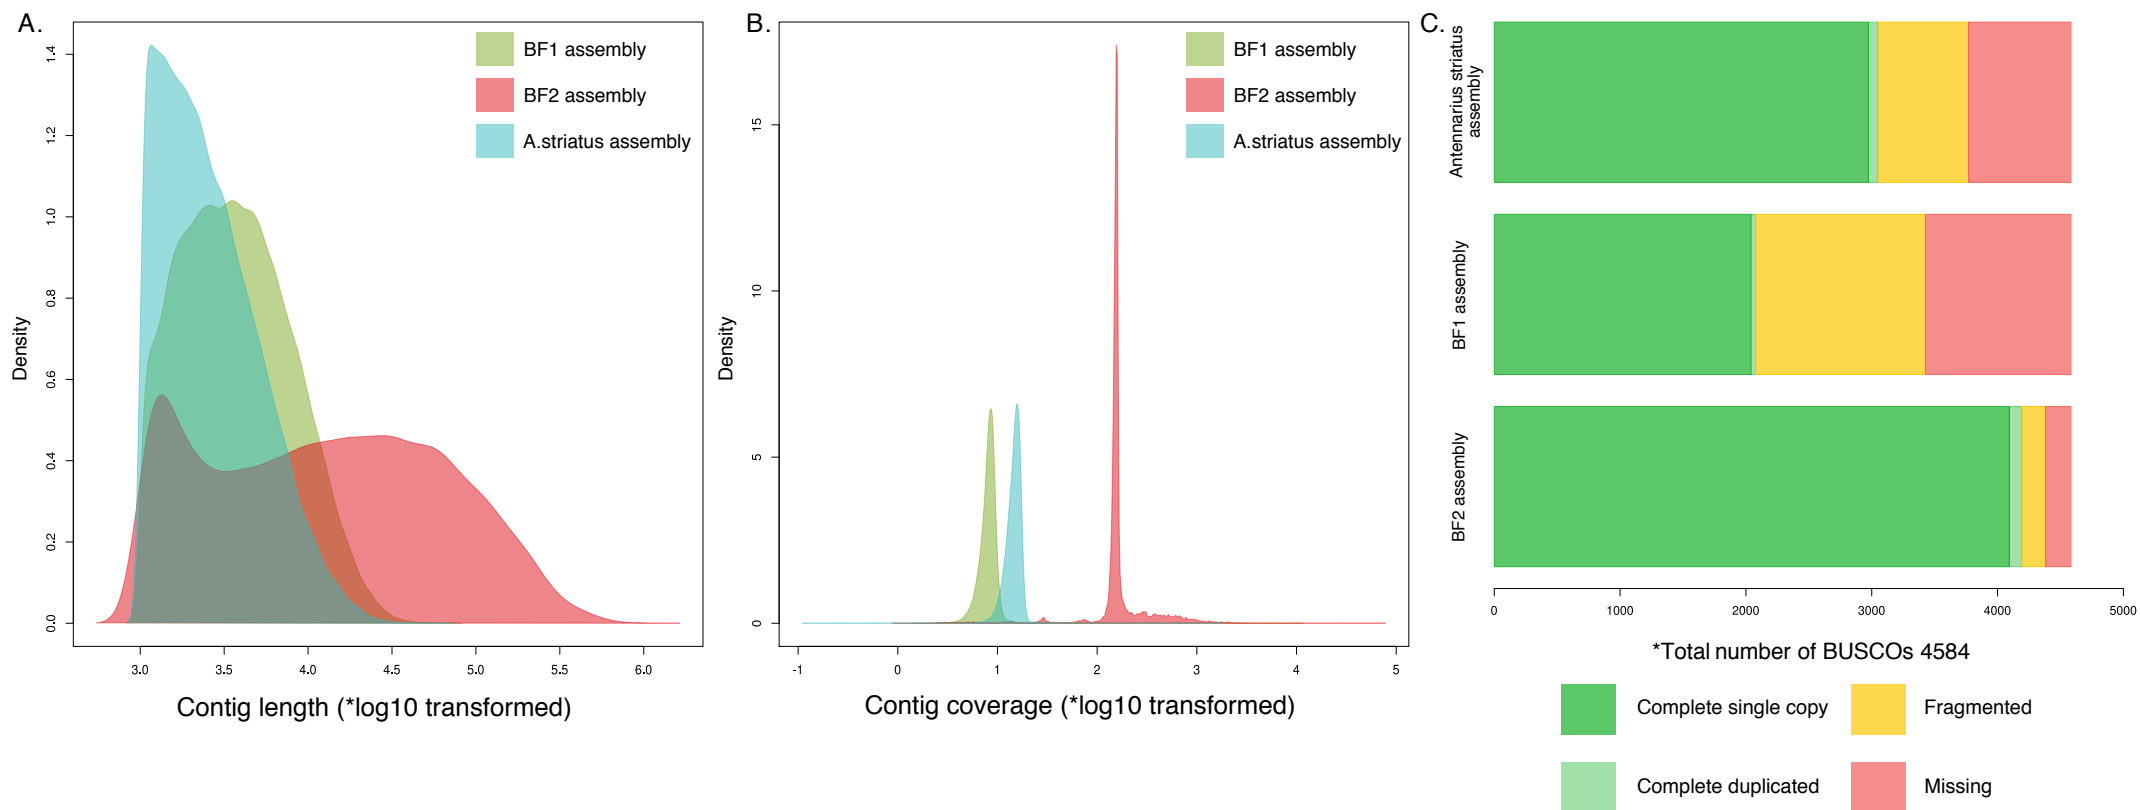

## S2. Sequences from the BF1 and BF2 assemblies that could be aligned to MHC II

### BF1 MHC class II fragment. Frame -3.

ctatcctaacaacaaatcaaatgggcaggatgtgacctcagctgtcattttttctgaagtgtt  
 I L N K S **N G Q D V T S A V I F S E V L**  
 cctgatgtggaat**ag**tactgccagattgagtcttacctggagtacatgccaacccctgga  
**P D V E \* Y C Q I E S Y L E Y M P T P G**  
 gcataaattacatgcatgataaacacctcagcctaccaaacaagtgtt**gag**tctgg  
**A \* I T C M D K H L S L P K Q V L \* V W**  
 ggcaaatattgcaattgtaatacaggatgagactatggacgatataaaaggagatt**taattt**  
**G K F A I V I Q** D E T M D D I K G D \* F  
 ccctcctcatgtct**gtag**caacatctcttctggatcagagaggattata**taattatt**gga  
 P S S C L \* Q H L F L D Q R G L \* L L E  
 caatttaact**tag**tattttttgtct**tag**ttagcactggcttcatctaatacaagtaaa  
 Q F N \* Y L F L S \* L A L A S S N T S K  
 atgcttggcgcagtcattcatata**taact**gcaacttaagaaaaatattgttctgtgctcatt  
 M P G A V I I \* L Q L K K N I V L V L I  
 ttttaacagtataagttgtgattcctgtggaatat**gac**tttgac**gtag**caaaaattat  
 F N S I S C D S C G I \* P C S \* \* Q N Y  
 tatca  
 Y

### BF2 MHC class II fragment. Frame +3.

atctctttgtgctcctgcttattttcttcatctctcttctgatatcccaacttattttgctaa  
 L F V L L L I F F I S L A I P I L I C \*  
 cttatccatgcttgtgtgcaaagcctataaataactatcctaacaacaaatcaaatgggcag  
 L N P C L C A K P I N T I L N K S **N G Q**  
 gatgtgacctcagctgtcattttttctgaagtgttgcctgatgtggaat**ag**tactgccag  
**D V T S A V I F S E V L P D V E \* Y C Q**  
 attgagtcttacctggagtacatgccaacccctggagc**ataa**attacatgcatggataaa  
**I E S Y L E Y M P T P G A \* I T C M D K**  
 cacctcagcctaccaaacaagtgtt**gag**tcttggggcacaatttgcattgtaatacag  
**H L S L P K Q V L \* V W G K F A I V I Q**  
 ga

### CLUSTAL O(1.2.4) alignment (\*stop codons removed)

```
bf1      -----ILNKSNGQDVTSAVIFSEVLPDVEYCQIE 29
bf2      L F V L L I F F I S L A I P I L I C L N P C L A K P I N T I L N K S N G Q
          *****

bf1      SYLEYMPTPGAITCMDKHLSPKQVLVWGKFAIVIQDEITMDDIKGDFPSSCLQHLFLDQR 89
bf2      SYLEYMPTPGAITCMDKHLSPKQVLVWGKFAIVIQ----- 96
          *****

bf1      G L L L E Q F N Y L F L S L A L A S S N T S K M P G A V I I L Q L K K N I V L V I F N S I S C D S C G I P C S Q N Y Y 149
bf2      ----- 96
```

A.

B.

### BF1 MHC class II fragment. Top 2 BLASTx hits at NCBI Nr

PREDICTED: rano class II histocompatibility antigen, A beta chain-like isoform X2 [Lates calcarifer]  
 Sequence ID: [XP\\_018527094.1](#) Length: 266 Number of Matches: 1

| Range 1: 151 to 213 |        |                              |                              | <a href="#">GenPept</a>    | <a href="#">Graphics</a> | <a href="#">Next Match</a> | <a href="#">Previous Match</a> |
|---------------------|--------|------------------------------|------------------------------|----------------------------|--------------------------|----------------------------|--------------------------------|
| Score               | Expect | Method                       | Identities                   | Positives                  | Gaps                     | Frame                      |                                |
| 68.6 bits(166)      | 1e-10  | Compositional matrix adjust. | 34/63(54%)                   | 44/63(69%)                 | 0/63(0%)                 | -3                         |                                |
| Query               | 470    | NGQDVTS                      | SAVIFSEVLPDVE*YCQIESYLEYMP   | TGA*ITCMDKHLSPKQVL*VWGKFAI | 291                      |                            |                                |
| Sbjct               | 151    | NGQ+VTS                      | SAV S+ +PD + Y QI SYLEY PTPG | ITCM +HL+L + +L VW F +     | 210                      |                            |                                |
| Query               | 290    | VIQ                          | 282                          |                            |                          |                            |                                |
| Sbjct               | 211    | AAE                          | 213                          |                            |                          |                            |                                |

PREDICTED: rano class II histocompatibility antigen, A beta chain-like isoform X1 [Lates calcarifer]  
 Sequence ID: [XP\\_018527088.1](#) Length: 299 Number of Matches: 1

| Range 1: 184 to 246 |         |                              |                            | <a href="#">GenPept</a> | <a href="#">Graphics</a> | <a href="#">Next Match</a> | <a href="#">Previous Match</a> |
|---------------------|---------|------------------------------|----------------------------|-------------------------|--------------------------|----------------------------|--------------------------------|
| Score               | Expect  | Method                       | Identities                 | Positives               | Gaps                     | Frame                      |                                |
| 68.6 bits(166)      | 1e-10   | Compositional matrix adjust. | 34/63(54%)                 | 44/63(69%)              | 0/63(0%)                 | -3                         |                                |
| Query 470           | NGQDVTS | SAVIFSEVLPDVE*YCQIESYLEYMP   | TGA*ITCMDKHLSPKQVL*VWGKFAI | 291                     |                          |                            |                                |
| Sbjct 184           | NGQ+VTS | SAV S+ +PD + Y QI SYLEY PTPG | ITCM +HL+L + +L VW F +     | 243                     |                          |                            |                                |
| Query 290           | VIQ     | 282                          |                            |                         |                          |                            |                                |
| Sbjct 244           | AAE     | 246                          |                            |                         |                          |                            |                                |

### BF2 MHC class II fragment. Top 2 BLASTx hits at NCBI Nr

PREDICTED: rano class II histocompatibility antigen, A beta chain-like isoform X2 [Lates calcarifer]  
 Sequence ID: [XP\\_018527094.1](#) Length: 266 Number of Matches: 1

| Range 1: 151 to 213 |         |                              | <a href="#">GenPept</a>    | <a href="#">Graphics</a> | <a href="#">Next Match</a> | <a href="#">Previous Match</a> |
|---------------------|---------|------------------------------|----------------------------|--------------------------|----------------------------|--------------------------------|
| Score               | Expect  | Method                       | Identities                 | Positives                | Gaps                       | Frame                          |
| 68.2 bits(165)      | 2e-11   | Compositional matrix adjust. | 34/63(54%)                 | 44/63(69%)               | 0/63(0%)                   | +3                             |
| Query 114           | NGQDVTS | SAVIFSEVLPDVE*YCQIESYLEYMP   | TGA*ITCMDKHLSPKQVL*VWGKFAI | 293                      |                            |                                |
| Sbjct 151           | NGQ+VTS | SAV S+ +PD + Y QI SYLEY PTPG | ITCM +HL+L + +L VW F +     | 210                      |                            |                                |
| Query 294           | VIQ     | 302                          |                            |                          |                            |                                |
| Sbjct 211           | AAE     | 213                          |                            |                          |                            |                                |

PREDICTED: rano class II histocompatibility antigen, A beta chain-like isoform X1 [Lates calcarifer]  
 Sequence ID: [XP\\_018527088.1](#) Length: 299 Number of Matches: 2

| Range 1: 184 to 246 |         |                              | <a href="#">GenPept</a>    | <a href="#">Graphics</a> | <a href="#">Next Match</a> | <a href="#">Previous Match</a> |
|---------------------|---------|------------------------------|----------------------------|--------------------------|----------------------------|--------------------------------|
| Score               | Expect  | Method                       | Identities                 | Positives                | Gaps                       | Frame                          |
| 68.2 bits(165)      | 2e-11   | Compositional matrix adjust. | 34/63(54%)                 | 44/63(69%)               | 0/63(0%)                   | +3                             |
| Query 114           | NGQDVTS | SAVIFSEVLPDVE*YCQIESYLEYMP   | TGA*ITCMDKHLSPKQVL*VWGKFAI | 293                      |                            |                                |
| Sbjct 184           | NGQ+VTS | SAV S+ +PD + Y QI SYLEY PTPG | ITCM +HL+L + +L VW F +     | 243                      |                            |                                |
| Query 294           | VIQ     | 302                          |                            |                          |                            |                                |
| Sbjct 244           | AAE     | 246                          |                            |                          |                            |                                |

| Range 2: 163 to 178 |                  |                              |  | <a href="#">GenPept</a> | <a href="#">Graphics</a> | 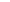 <a href="#">Next Match</a> |  <a href="#">Previous Match</a> | 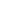 <a href="#">First Match</a> |
|---------------------|------------------|------------------------------|--|-------------------------|--------------------------|------------------------------------------------------------------------------------------------------------------|----------------------------------------------------------------------------------------------------------------------|-------------------------------------------------------------------------------------------------------------------|
| Score               | Expect           | Method                       |  | Identities              | Positives                | Gaps                                                                                                             | Frame                                                                                                                |                                                                                                                   |
| 28.1 bits(61)       | 2e-11            | Compositional matrix adjust. |  | 10/16(63%)              | 14/16(87%)               | 0/16(0%)                                                                                                         | +2                                                                                                                   |                                                                                                                   |
| Query 68            | SMLVCKAYKYYPKQIK | 115                          |  |                         |                          |                                                                                                                  |                                                                                                                      |                                                                                                                   |
|                     | ++LVC AY +YPKQI+ |                              |  |                         |                          |                                                                                                                  |                                                                                                                      |                                                                                                                   |
| Sbjct 163           | AILVCSAYNFYPKQIQ | 178                          |  |                         |                          |                                                                                                                  |                                                                                                                      |                                                                                                                   |

### S3. Contaminant mitochondrial sequences in *A. striatus*

| Contig identifier       | Length (bp) | Match (identity)                                                                           | Subject/query alignment coordinates        |
|-------------------------|-------------|--------------------------------------------------------------------------------------------|--------------------------------------------|
| <b>utg7180000251100</b> | 1749        | Trachurus japonicus (AP003091.1) and Trachurus trachurus (AB108498.1) 98%                  | 7223-5475/1-1749                           |
| <b>utg7180000189499</b> | 3298        | Trachurus japonicus (AP003091.1) 98%                                                       | 10559-7263/1-3297                          |
| <b>utg7180002535071</b> | 8275        | Trachurus japonicus (AP003091.1 and AP003092.1) 97%                                        | 10559-16559/1-6000<br>1-2276/6001-8275     |
| <b>utg7180002551981</b> | 3238        | Trachurus japonicus (AP003091.1 and AP003092.1) 94%                                        | 5430-2193/1-3238                           |
| <b>utg7180000416975</b> | 1218        | Decapterus maruadsi (KJ004518.1) 87.44%<br>Decapterus macarellus (KM986880.1) 86.86%       | 9937-11146/9-1218<br>9938-11147/9-1218     |
| <b>utg7180002761404</b> | 2531        | Decapterus maruadsi (KJ004518.1) 91%                                                       | 7861-5334/4-2531                           |
| <b>utg7180000037847</b> | 2676        | Coreoperca loona (KJ644781.1) 86.59%<br>Siniperca scherzeri (AP014527.1) 86.57%            | 203-2786/1-2609<br>202-2784/1-2609         |
| <b>utg7180002123755</b> | 13110       | Emmelichthys struhsakeri (AP004446.1) 79.72%<br>Monodactylus argenteus (AP009169.1) 79.63% | 2787-15652/59-12949<br>2786-15672/59-12972 |

#### S4. Coverage of MHC II and mitochondrial sequences in *A. striatus*

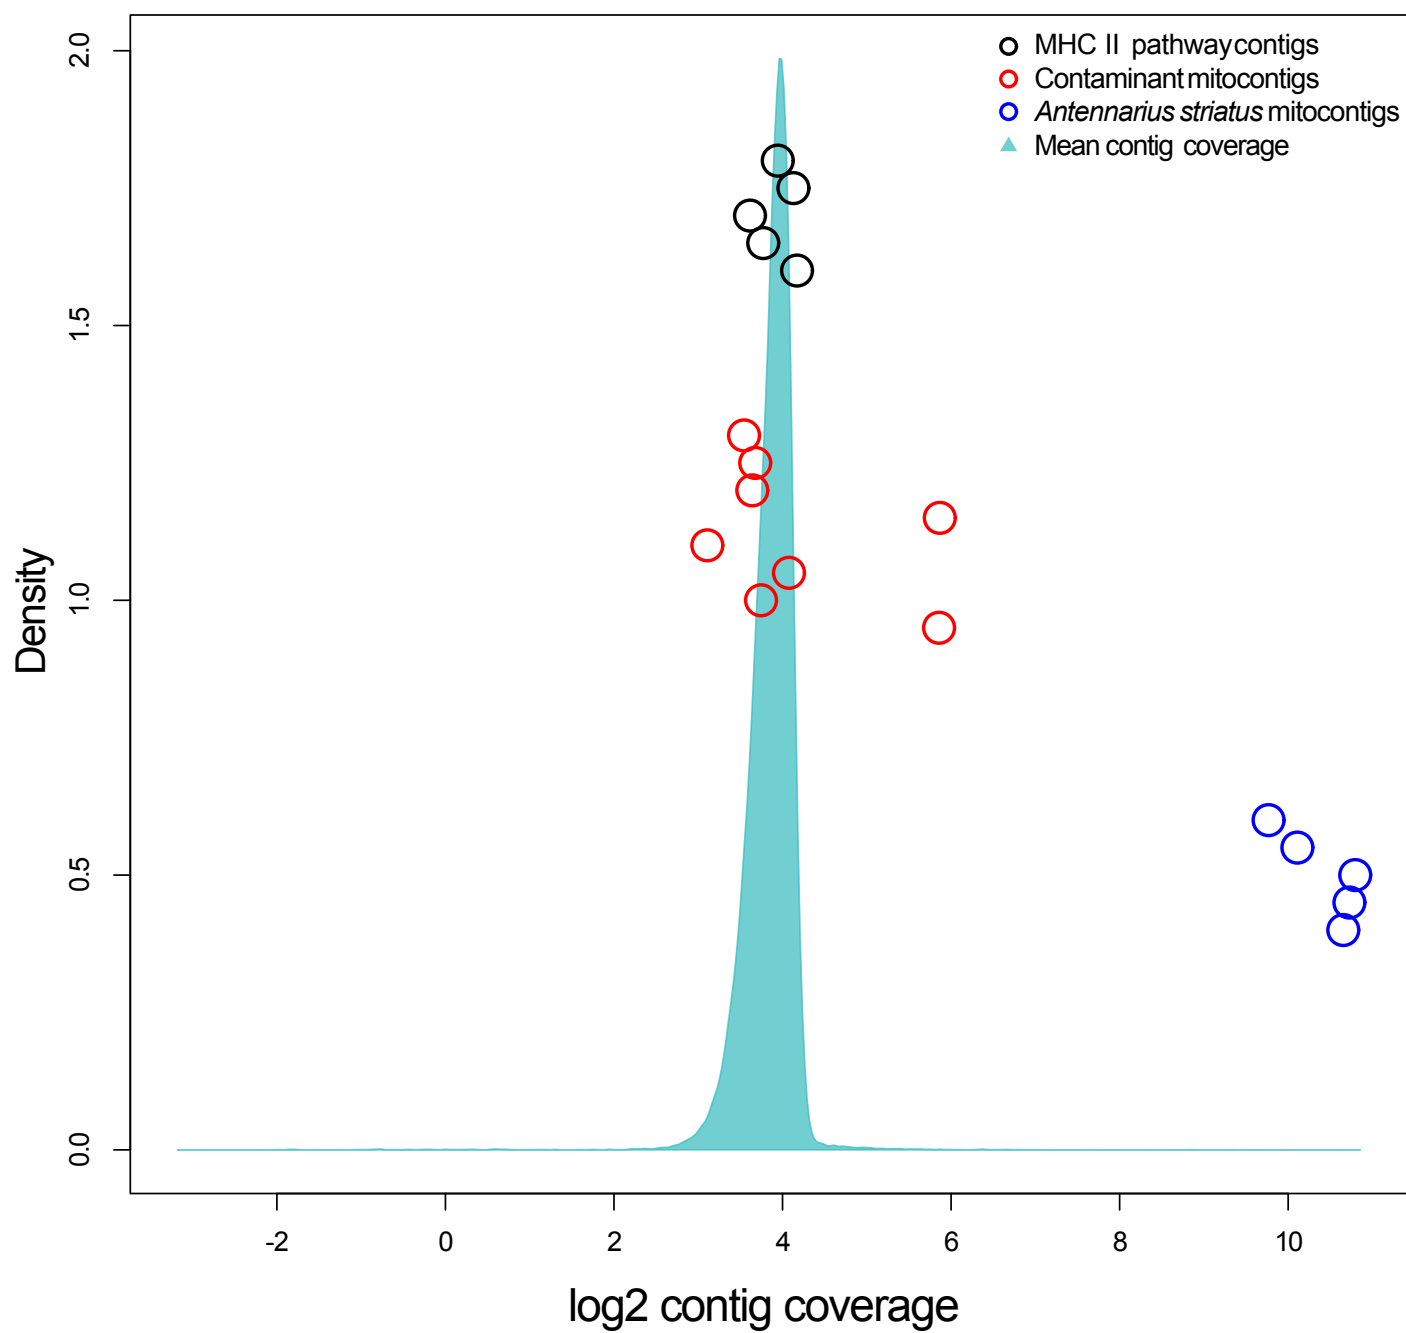

## S5. Phylogenetic trees based on complete mitochondrial genome sequences of species in the Lophiiformes order

A.

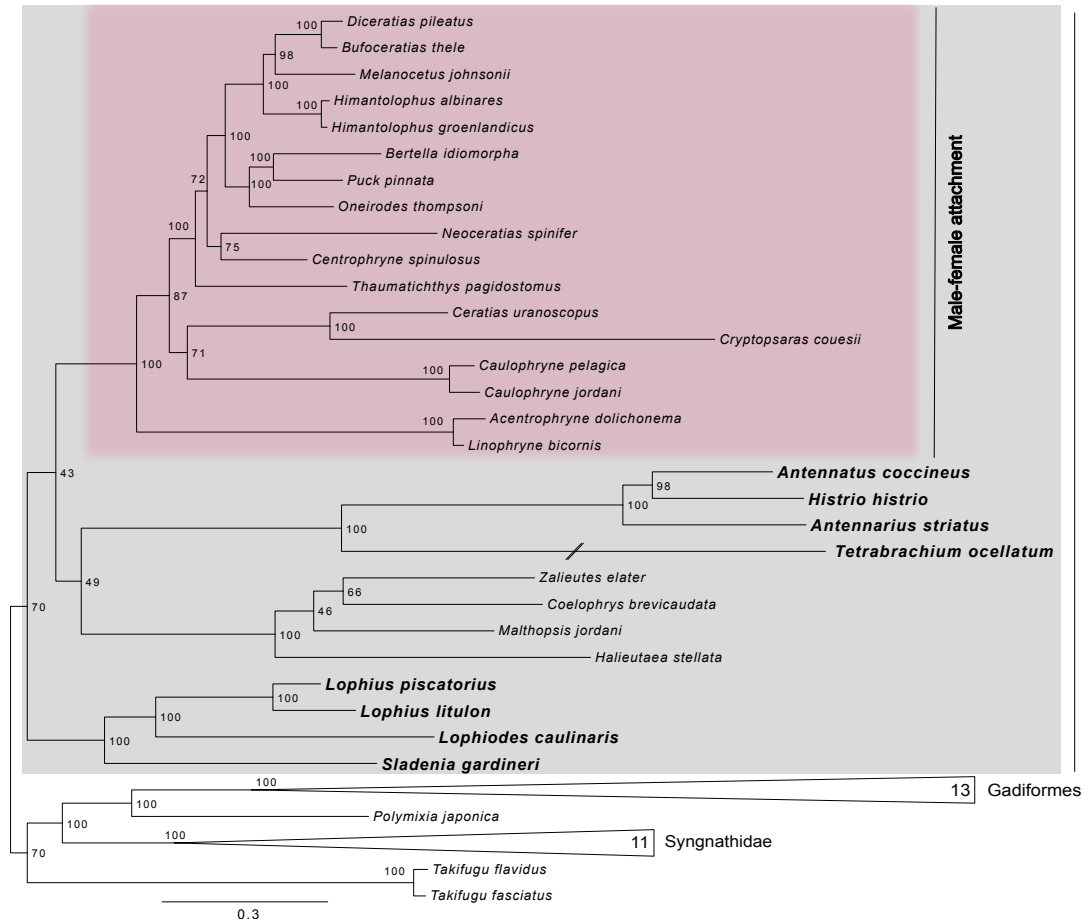

B.

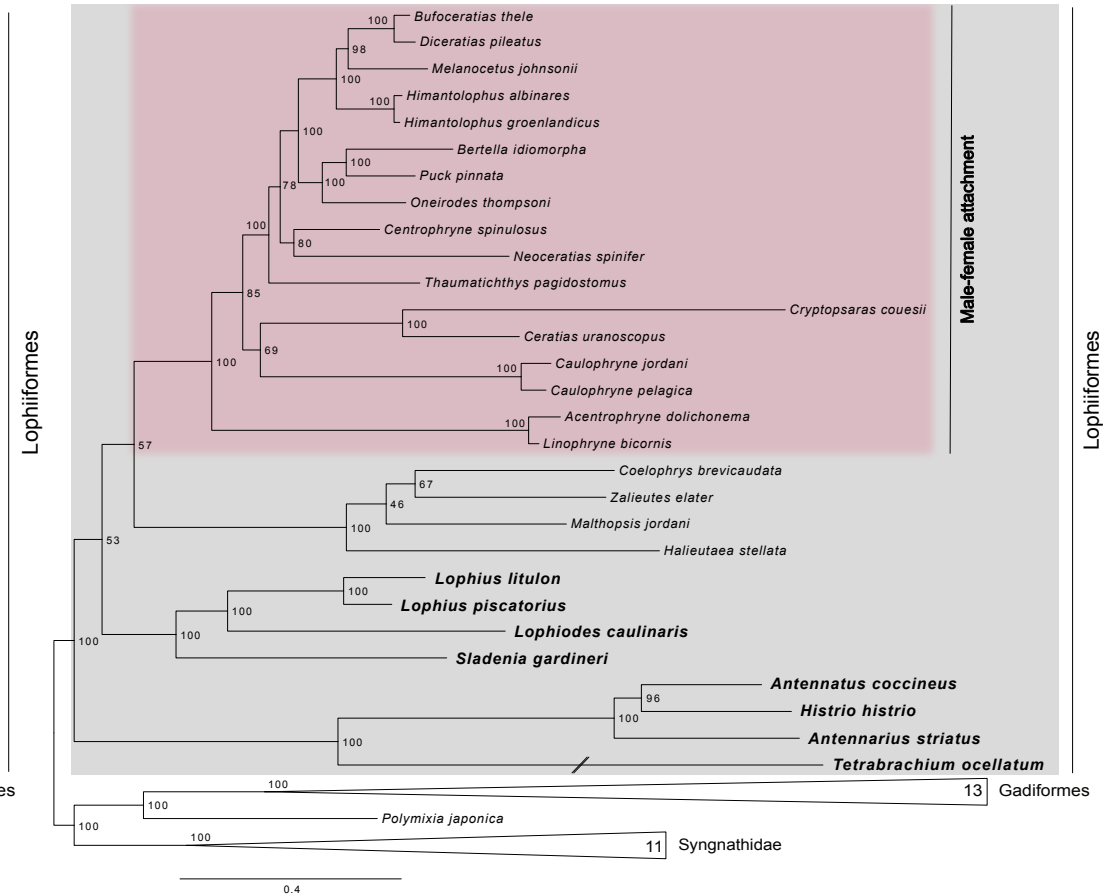

S6. Identification of immune gene orthologues, pages 6-11

## AID

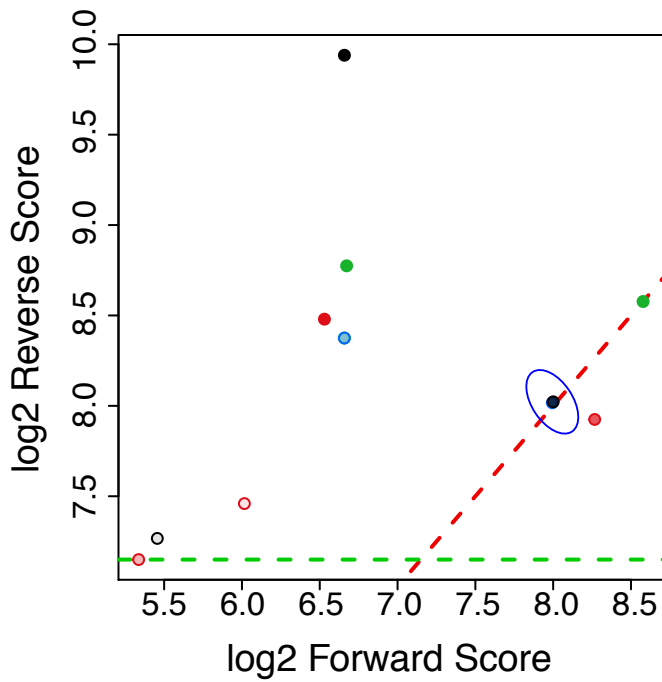

## AIRE

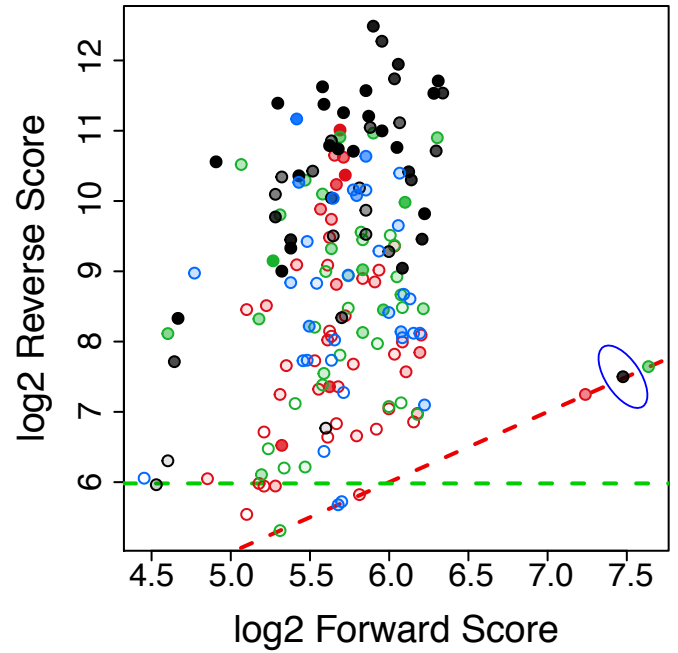

## AP1M2

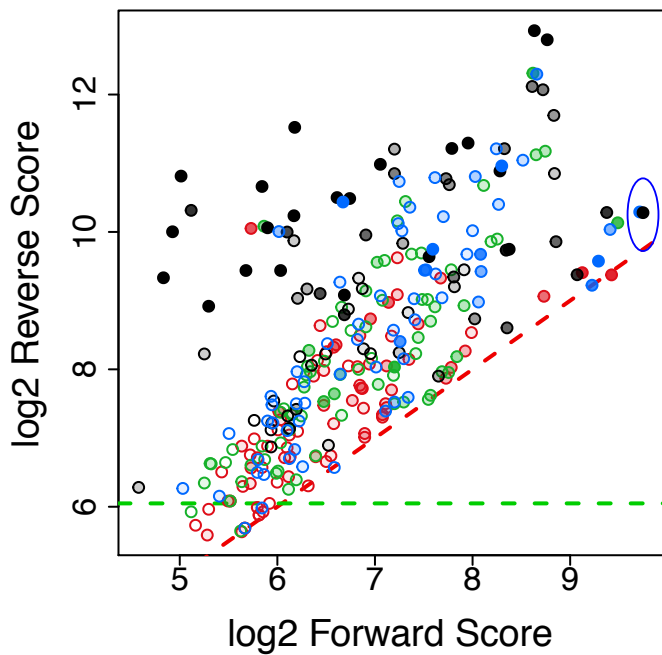

## AP2M1

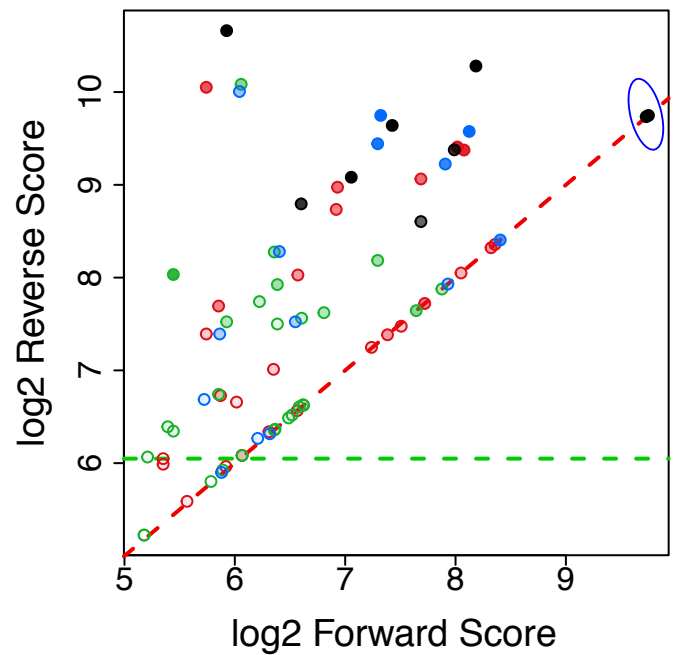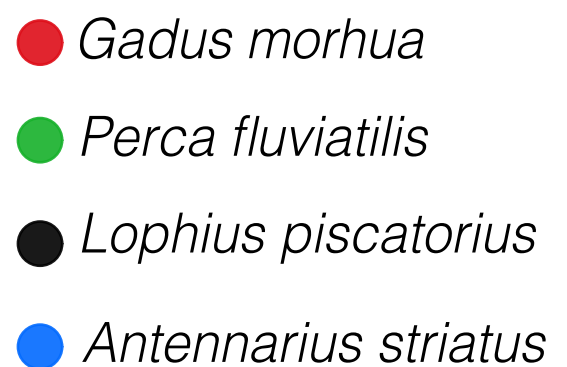

## r. Identification of immune gene orthologues (Continued from p.6)

## AP3M2

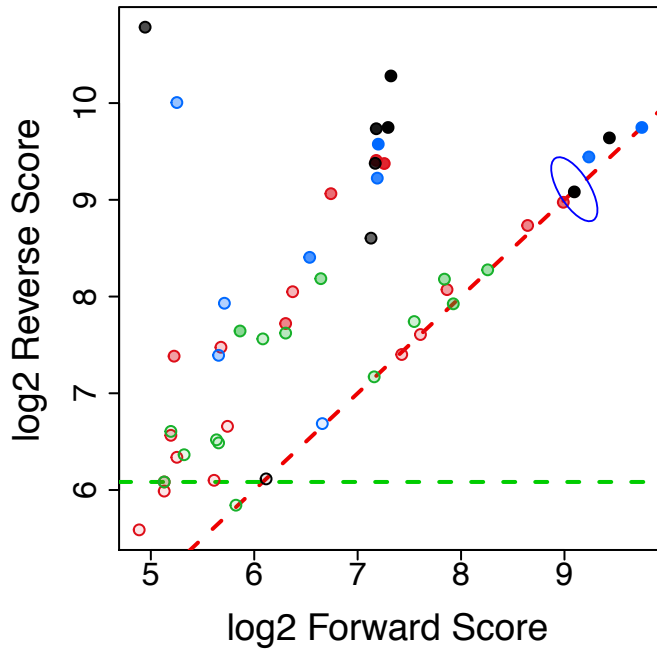

## B2m

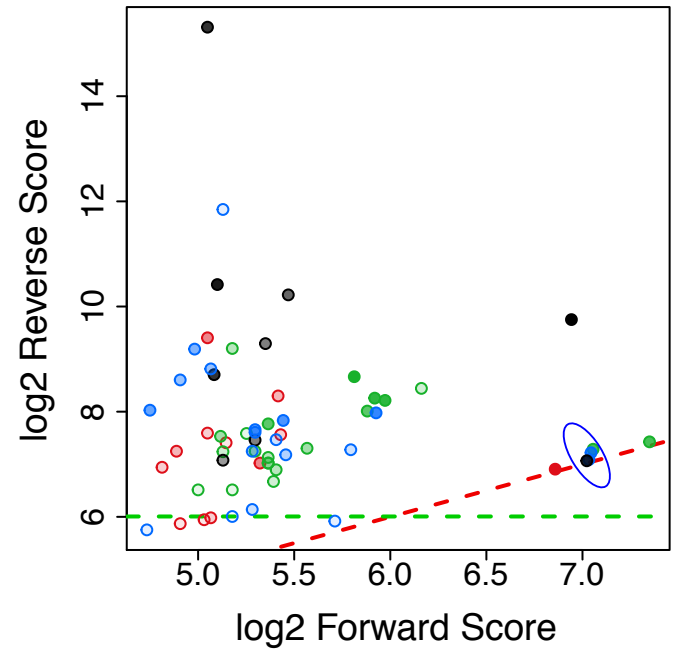

## BATF

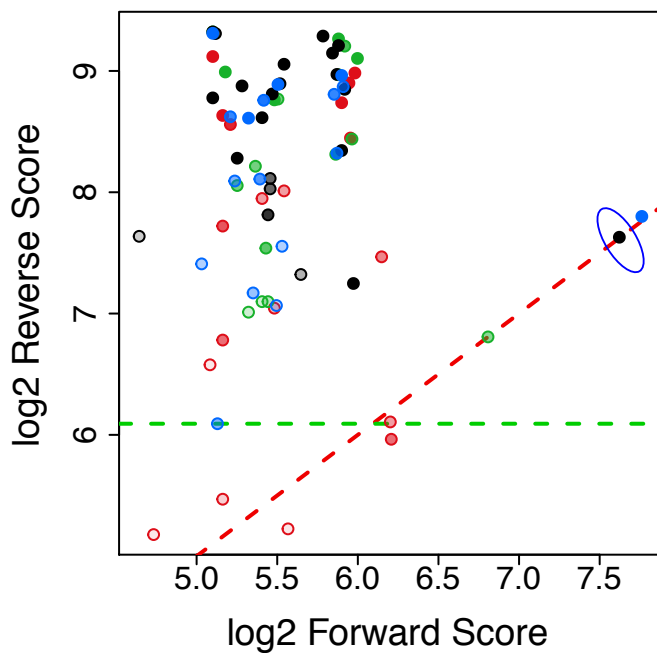

## CIITA

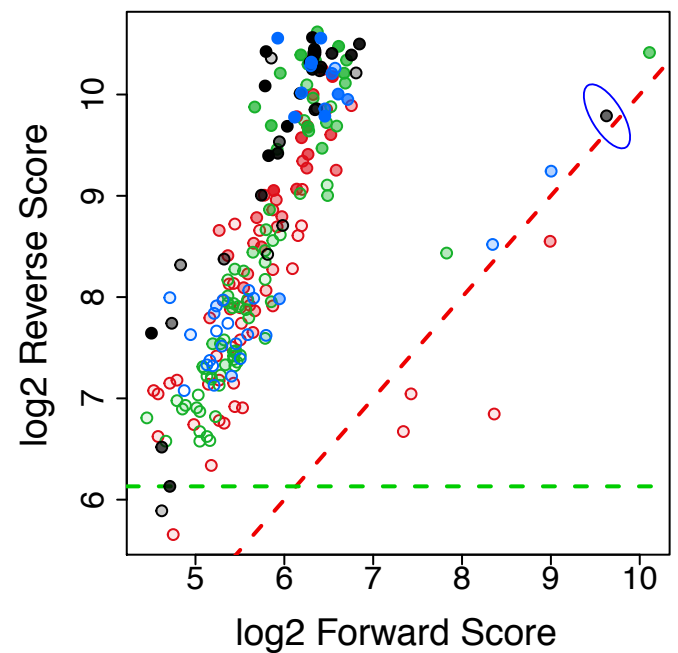

● *Gadus morhua*

● *Perca fluviatilis*

● *Lophius piscatorius*

● *Antennarius striatus*

# S6. Identification of immune gene orthologues (Continued from p.6)

## CTSS1

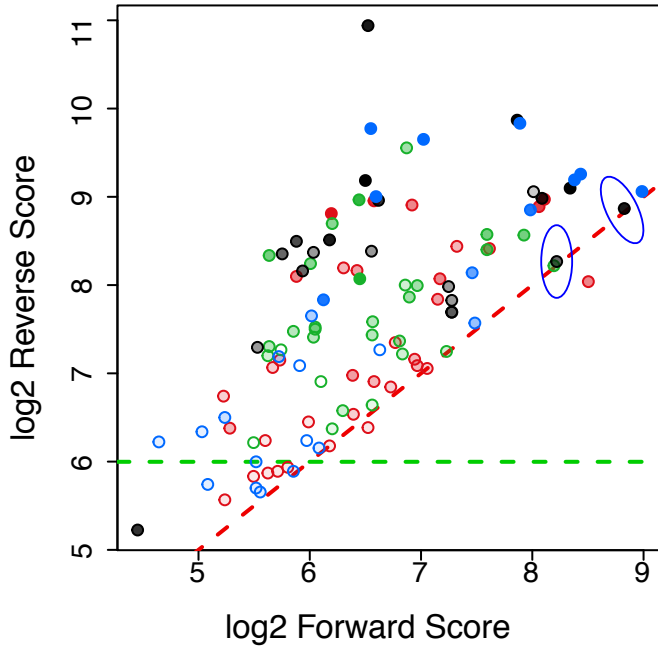

## CTSS2

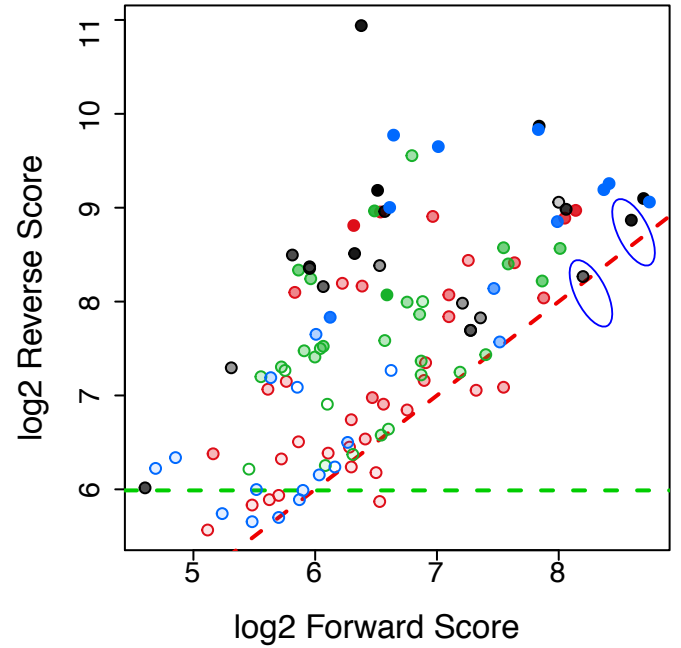

## ERAP1

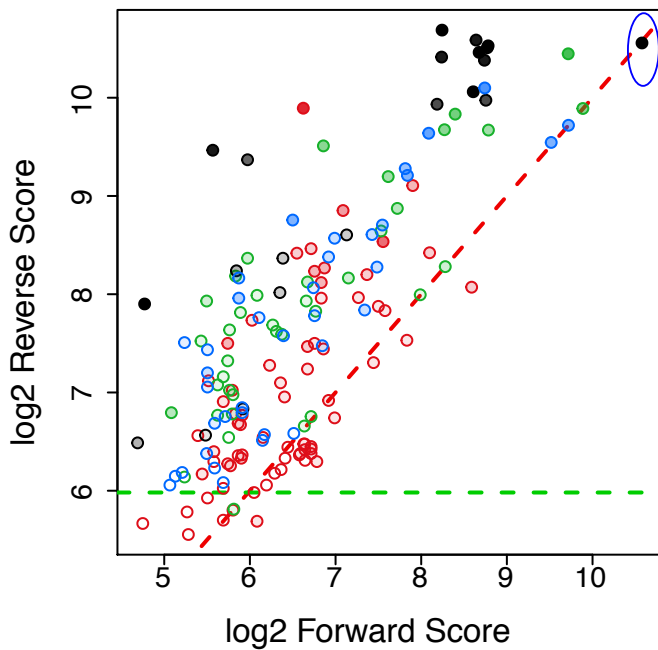

## ERAP2

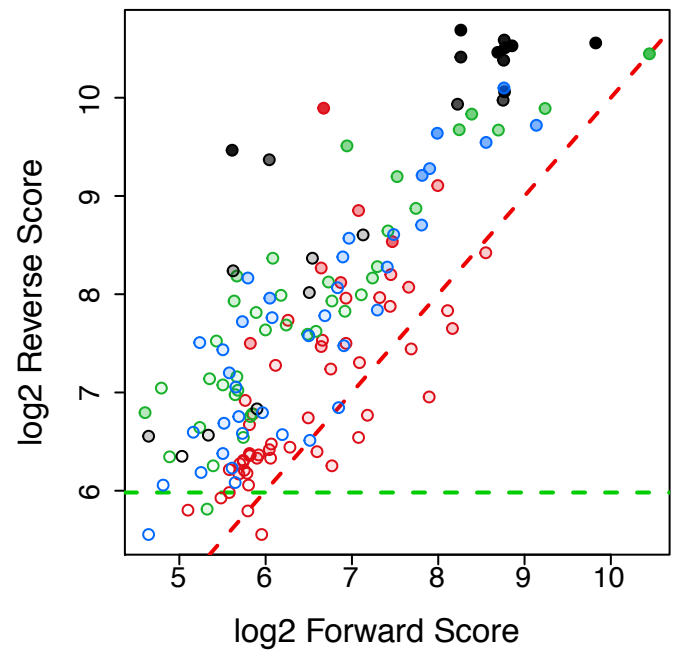

● *Gadus morhua*

● *Perca fluviatilis*

● *Lophius piscatorius*

● *Antennarius striatus*

## S6. Identification of immune gene orthologues (Continued p.6)

## HSP90

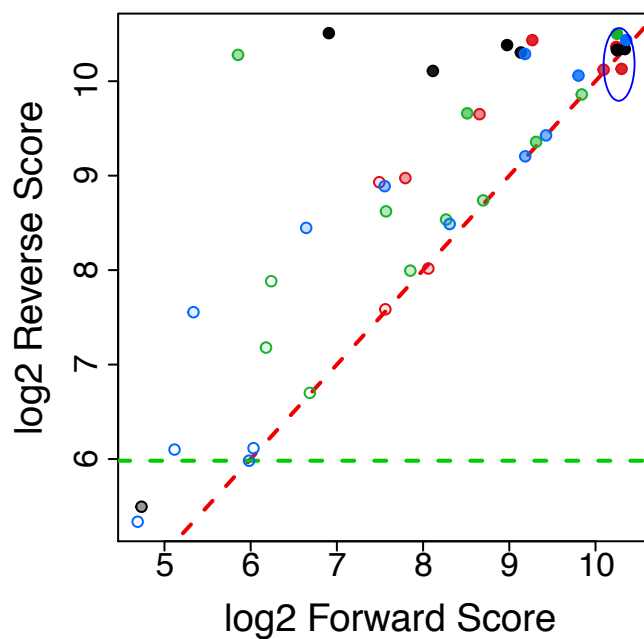

## LNPEP

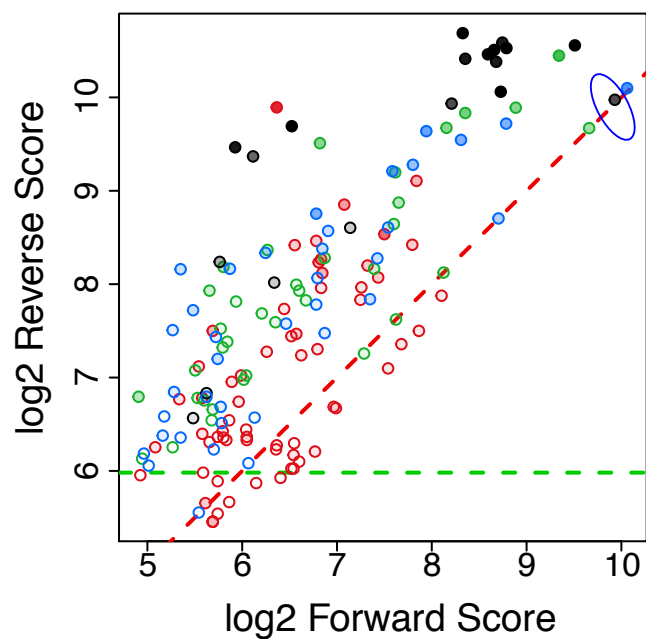

## RAG1

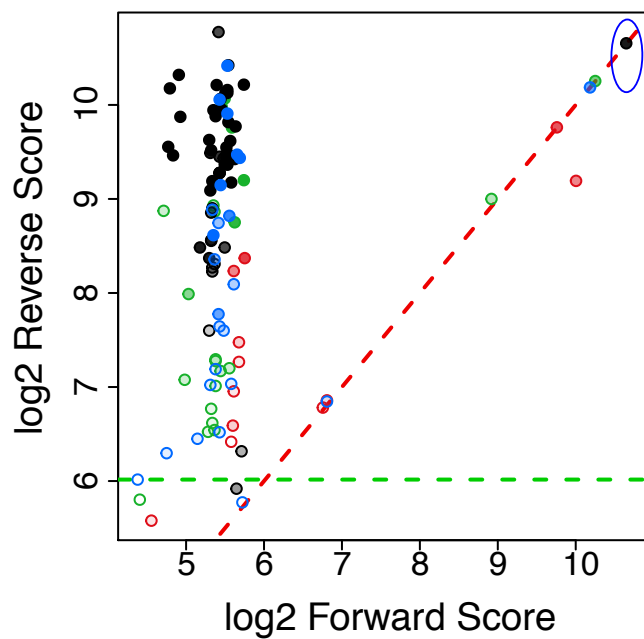

## RAG2

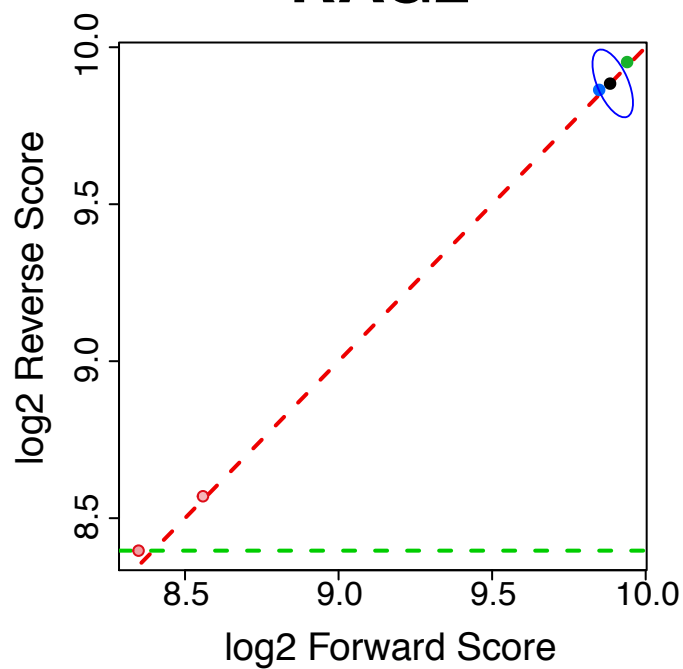

- *Gadus morhua*
- *Perca fluviatilis*
- *Lophius piscatorius*
- *Antennarius striatus*

## S6. Identification of immune gene orthologues (Continued p.6)

## SEC61A1

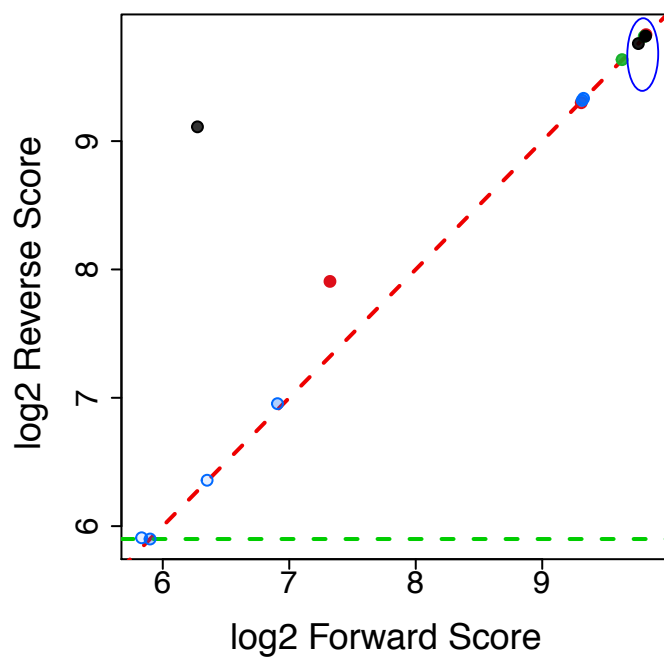

## SEC61A1-2

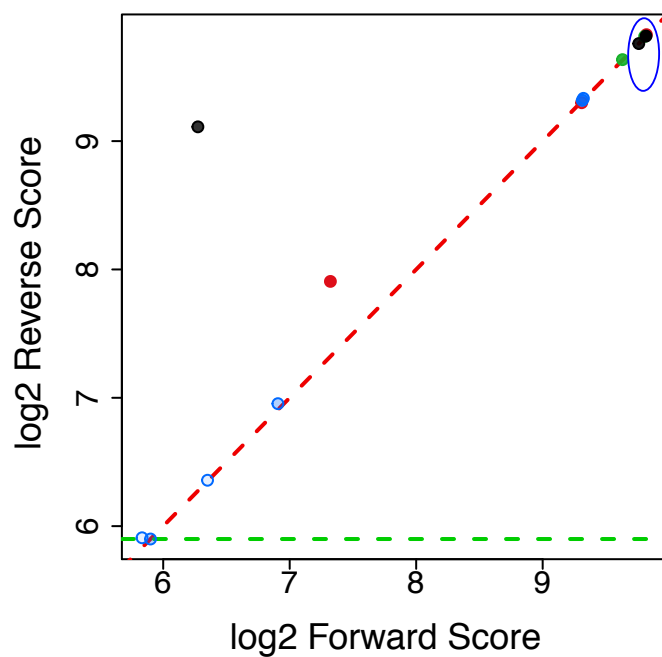

## SEC61G

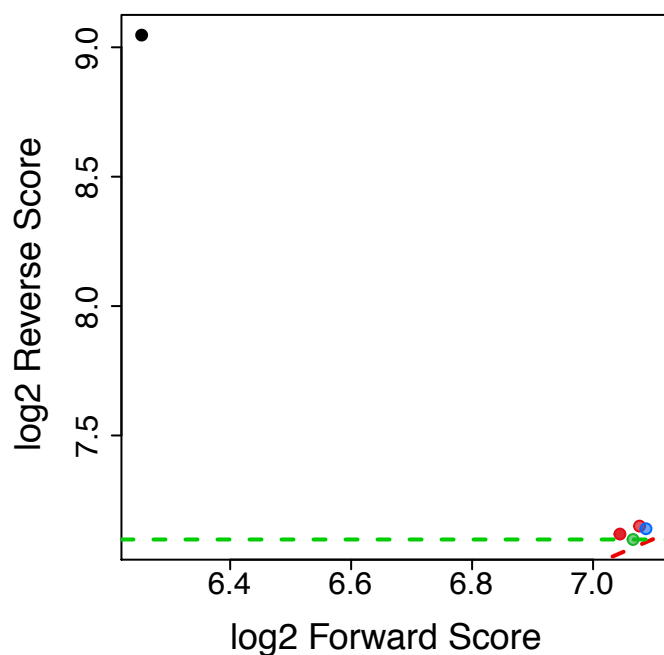

## SSR3

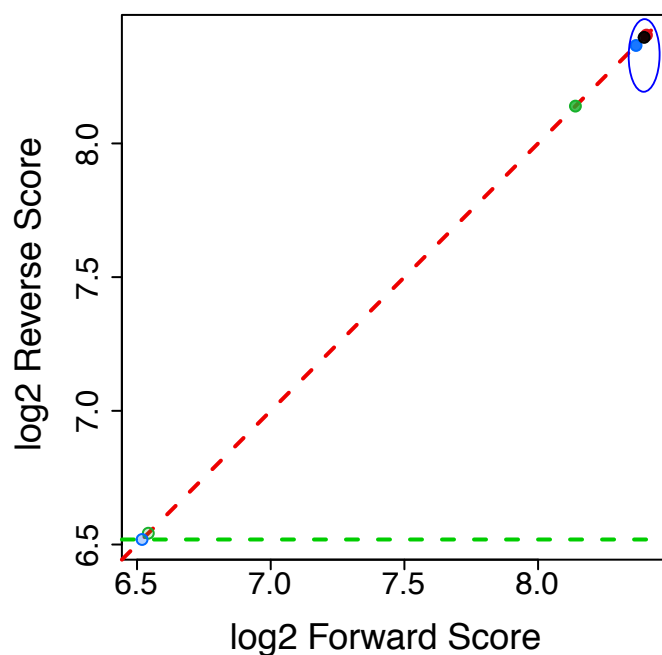

● *Gadus morhua*

● *Perca fluviatilis*

● *Lophius piscatorius*

● *Antennarius striatus*

# S6. Identification of immune gene orthologues (Continued p.6)

## TAP1

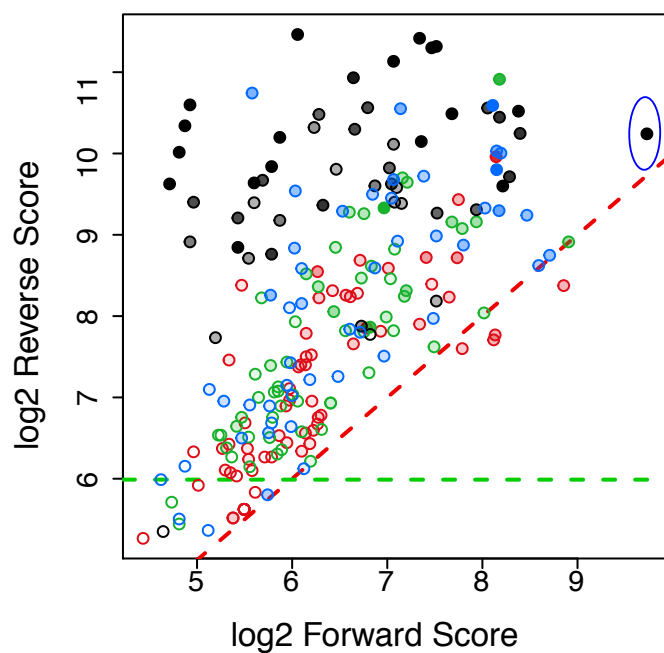

## TAP2

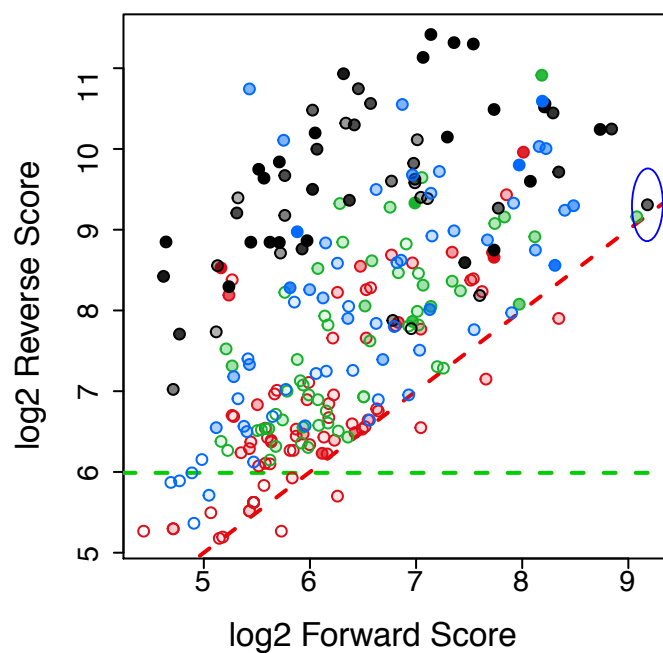

## TAPBP

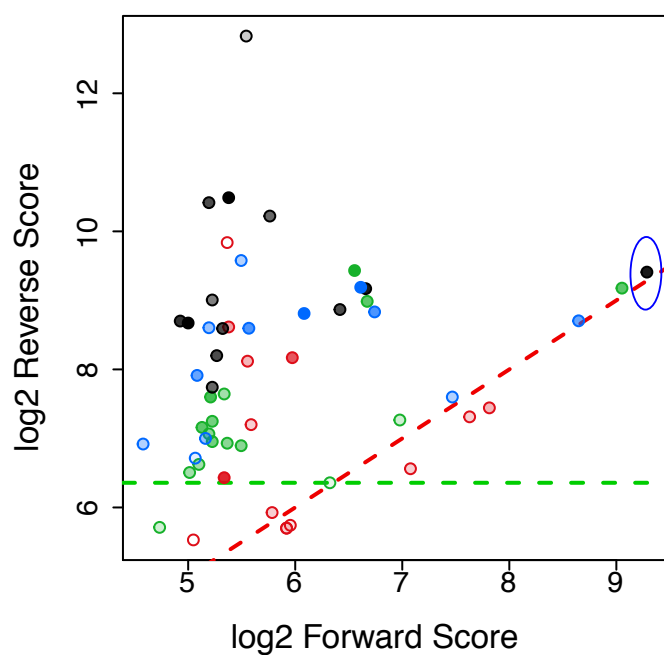

- *Gadus morhua*
- *Perca fluviatilis*
- *Lophius piscatorius*
- *Antennarius striatus*

## S7. Gene synteny for the CD74 and CD4 gene regions

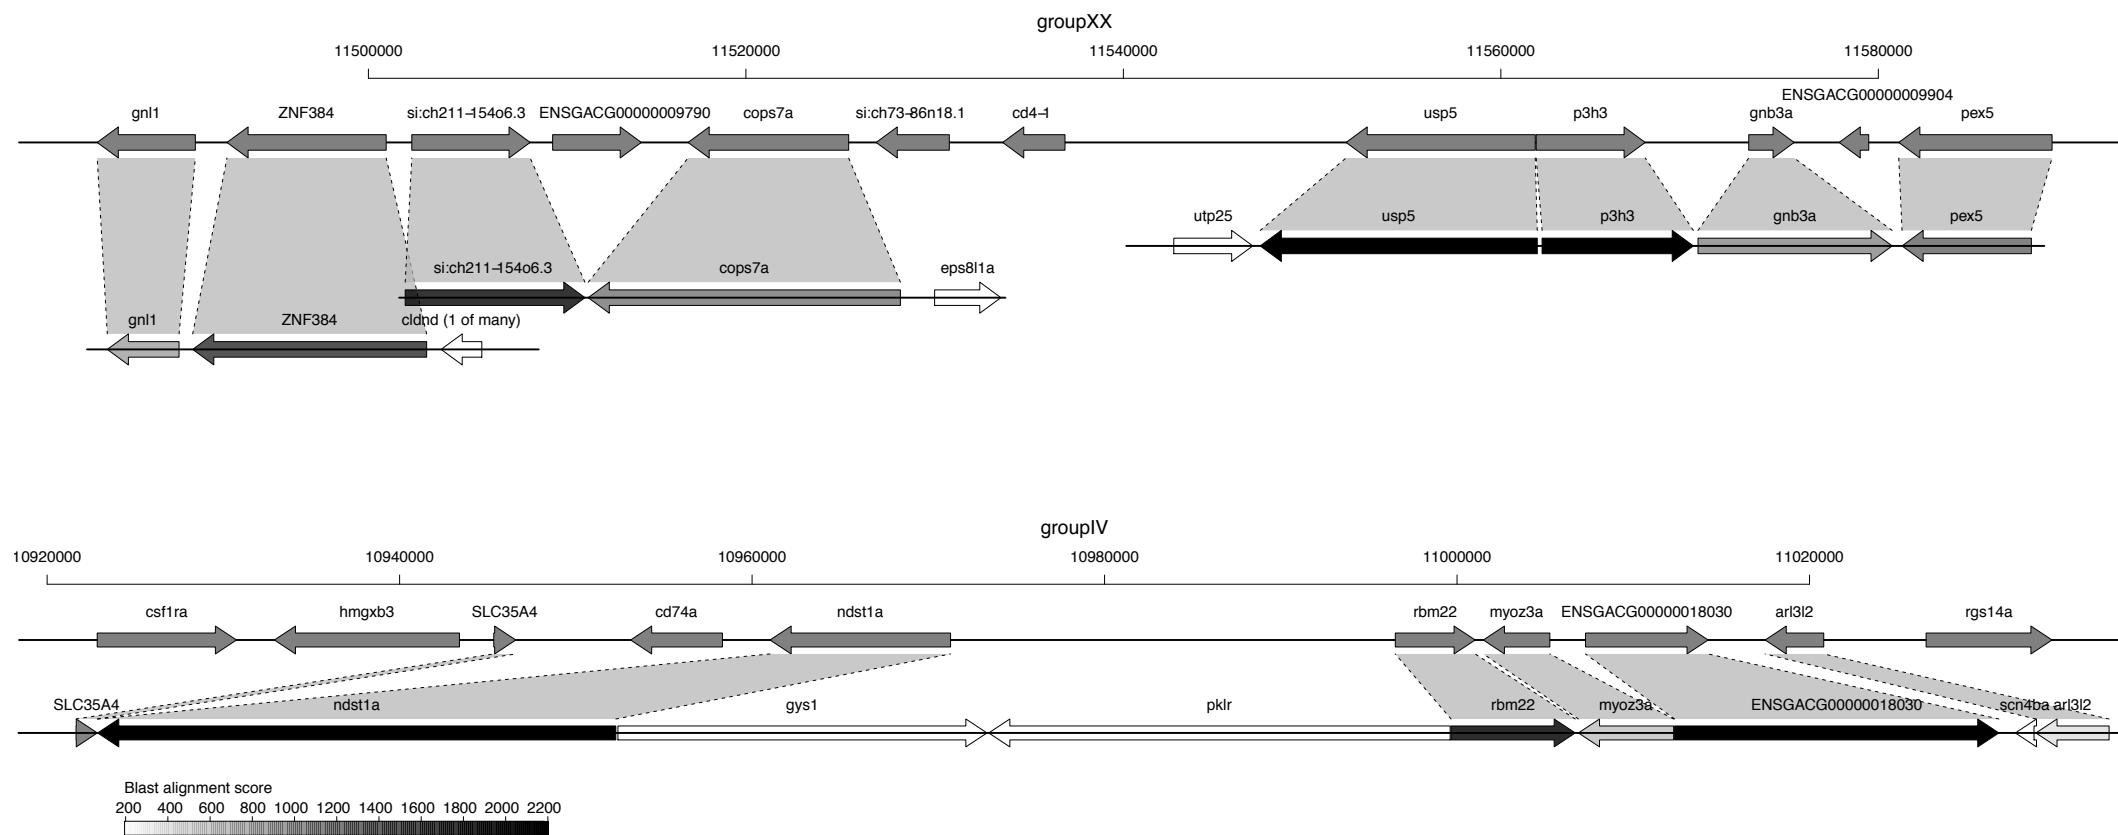

# Supplementary figure legends

## S1. Assembly statistics

Kernel density estimates of log (base 10) transformed contig length (A), coverage (B) and gene completeness (C) for the two *L. piscatorius* and the single *A. striatus* assembly.

## S2. Sequences from the BF1 and BF2 assemblies that could be aligned to MHC II

**A.** Nucleotide and deduced amino acid sequences of the identified MHC II fragments. Residues shown in red mark the amino acids that were aligned by BLAST to MHC II  $\beta$  sequences.

**B.** Alignment of amino acid sequences from both assemblies (with stop codons removed) that aligned to MHC II  $\beta$  confirm that the same sequence was identified in both assemblies.

**C.** Top 2 BLASTx hits for the identified fragments. The figure shows direct screen-grabs from the NCBI BLAST web service.

## S3. Contaminant mitochondrial sequences in *A. striatus*

Hits that we consider identifiable to a species level are marked with green. All sequences were identified with BLASTn and e-value threshold of 10. Hits shorter than a 1000 bp were discarded.

## S4. Coverage of MHCII and mitochondrial sequences in *A. striatus*

Kernel density estimate of log2 transformed mean coverage for all contigs (cyan), mean coverage of MHC II containing contigs (black points) and mitochondrial contigs (red and blue points).

Mitochondrial contigs identified as *A. striatus* sequences (blue points) were sequenced at 16 to 64 times the depth observed for contaminant mitochondrial sequences (red points). Each point represents one contig. Mean coverage for each contig was calculated by mapping quality trimmed reads to the assembly, converting bam to by-base coverage bed files and calculating the mean.

## S5. Phylogenetic trees based on complete mitochondrial genome sequences of species in the Lophiiformes order

The internal branch ordering is dependent on the choice of outgroups, with the position of the Antennariodei and Lophiidei clades occupying the most basal position in A and B respectively.

The scale indicates the number of substitutions per site. The *Tetrabrachium ocellatum* branch length has been halved due to its extreme length. Node support values are bootstrap probabilities based on 500 iterations.

Phylogenetic relationships were inferred using a partitioned maximum likelihood analysis (with first, second and third codon positions, rRNA and tRNA as partitions) and a GTR GAMMA model as implemented in RaxML [1].

**A.** Tree created using *Polymixia japonica*, Gadiformes, Syngnathidae and Tetraodontiformes as the outgroups.

**B.** Tree created using *Polymixia japonica*, Gadiformes and Syngnathidae as the outgroups.

## **S6. Identification of immune gene orthologues. Pages 6-11**

Illustration of identification criteria. Scores of alignments of putative orthologue sequences to the initial bait set (forward score, X-axis) plotted against scores obtained by alignment to sequences in the UniProt database (reverse score, Y-axis). The point fill transparency indicates the ratio of the alignment length to the length of the UniProt subject. Solid fills (alpha=1) correspond to full length alignments (i.e. the alignment covers the complete UniProt sequence). indicates relationship between the alignment length and length of the UniProt subject. Solid fill colour corresponds to 1/1 relationship. Orthologues should lie close to the Y=X line indicated by the dashed red line. The green dashed line shows the inferred e-10 e-value threshold. Points that we think represent orthologous sequences are marked with a blue ellipse. Peptide IDs corresponding to the selected points are collected in supplementary table 2, along with comments about the selection process., along with some comments about selection process. For additional information see *gene.hits.tsv* and *esm\_pisc\_pep.fasta*.

## **S7. Gene synteny for the CD74 and CD4 gene regions in *L.piscatorius* and *G. aculeatus***

The locations of orthologues to genes that are usually found in the CD4 and CD74 regions were identified in the BF2 assembly of *L. piscatorius* in the same manner as described above. To verify the identity of predicted genes we also aligned them to the NCBI nr database and manually inspected the resulting alignments. The synteny of the genes lying in the identified contigs was tested in *Gasterosteus aculeatus*. Genscan predicted peptides were blasted against *G. aculeatus* sequences (Ensembl *gasterosteus aculeatus* core 97.1). The top scoring alignment was taken as the gene identity for the genscan predictions and the matching contigs were aligned to their respective *G. aculeatus* loci using coordinates provided by Ensembl and the genscan predictions using a custom R-script. Top and bottom panel: CD4 and CD74 loci respectively. Genome positions in *G. aculeatus* are indicated by the scale bar; groupXX and groupIV are linkage group identifiers.

Shading of *L. piscatorius* gene predictions indicate the blast alignment score. Plots are to scale.

# Supplementary Methods

**\*\*To find all scripts referred to in this ESM see *esm\_scripts.txt***

## Sequencing and genome assembly

The raw reads were trimmed from adapters and low quality bases using Cutadapt [2] with 25 as a quality threshold. Only Illumina data was used for the assemblies. Prior to assembly, overlapping read pairs were merged using FLASH (v1.2.11) [3]. Final assemblies were constructed with SPAdes (v3.10.0) [4] employing 6 kmer lengths (21, 33, 55, 77, 99, 127/103). Basic assembly statistics were calculated with QUAST (v4.4.1) [5] and gene-space completeness assessed using BUSCO (v2.0) [6] with the actinopterygii dataset (odb9). The trimmed reads were used to approximate the genome size with Jellyfish (v2.2.6) [7] and a suite of perl scripts ([http://josephryan.github.com/estimate\\_genome\\_size.pl/](http://josephryan.github.com/estimate_genome_size.pl/)).

## Orthologue identification

In order to identify orthologues of adaptive immune system genes in *Lophius piscatorius* genome assemblies without the use of a predetermined e-value and bit score thresholds, we developed the strategy described below. Each step described was implemented in a short python (.py) or shell (.sh) script as indicated.

### 1. Identification of contigs that contain immune genes

We used a set of full-length amino acid sequences of 29 immune genes [8] and HSP90 from 10 species to search for orthologues in both our assemblies (BF1 and BF2). We also performed the same procedure for previously published draft genome assemblies of *Antennarius striatus*, *Gadus morhua* and *Perca fluviatilis* [8] as positive and negative controls to validate our strategy.

Sequences for the following species were obtained from Ensembl:

*Danio rerio*, *Gadus morhua*, *Gasterosteus aculeatus*, *Tetraodon nigroviridis*, *Oryzias latipes*, *Oreochromis niloticus*, *Takifugu rubripes*, *Xiphophorus maculatus*, *Poecilia formosa*, *Astyanax mexicanus*

Genes in the dataset:

|         |         |          |          |            |              |          |
|---------|---------|----------|----------|------------|--------------|----------|
| 1.AID   | 6.B2m   | 11.CIITA | 16.HSP90 | 21.MHCIIa  | 26.SEC61A1-2 | 31.TAPBP |
| 2.AIRE  | 7.BATF  | 12.CTSS1 | 17.CD74a | 22.MHCIIb  | 27.SEC61G    |          |
| 3.AP1M2 | 8.CD4   | 13.CTSS2 | 18.CD74b | 23.RAG1    | 28.SSR3      |          |
| 4.AP2M1 | 9.CD8a  | 14.ERAP1 | 19.LNPEP | 24.RAG2    | 29.TAP1      |          |
| 5.AP3M2 | 10.CD8b | 15.ERAP2 | 20.MHCI  | 25.SEC61A1 | 30.TAP2      |          |

To identify contigs containing candidate orthologues, we aligned the peptide sequences encoded by these genes to assemblies using tBLASTn (*manyfish\_blast.py*). To reduce the false negative rate at this step we used a permissive e-value threshold of 1 (compared to the e-10 threshold usually used) but limited the number of target sequences to 50 and relied on post-filtering to remove incorrect matches.

Identifiers of contigs containing alignments to the seed genes were extracted from the BLAST output and split by assembly and gene into separate files (*process\_blast.py*) which were used for downstream analyses.

## 2. Contig extraction and gene prediction

Selected contigs were subjected to gene prediction by Genscan [10], resulting in a set of amino acid sequences for each immune gene and matching contig. These sequence sets included both the amino acid sequences of orthologous immune genes and unrelated sequences located within the same contigs. To identify the orthologues, we used two further BLASTp screens which we refer to as Forward and the Reverse BLAST.

All predicted peptides from the BF2 *L. piscatorius* assembly (including non-immune peptides) sorted by gene can be found in the *esm\_pisc\_pep.fasta* file.

## 3. Forward BLAST

In order to provide alignment scores that could be compared to those in an extended blast against UniProt (step 4), we aligned amino acid sequence sets identified by Genscan in step 2 to the initial seed set (*forward\_blast.sh*) using BLASTp. Again we used an e-value threshold of 1 and limited the number of target sequences to 50.

Peptide sequences aligning to their respective seed genes from step 1 were selected for further analyses (*filter\_forward\_blast.sh*). For example, peptides derived from contigs identified by tBLASTn with AIRE as a query were filtered to remove all peptides not aligned to AIRE.

We refer to the BLASTp bit score values obtained in this search as the Forward BLAST score.

## 4. Reverse BLAST

The majority of alignments obtained in the first rounds of blast with the seed set of immune genes are likely to involve proteins that are not orthologous, but which contain domains with some homology with seed set domains. Such sequences should align with better scores to their true orthologues, at least some of which we would expect to find within the UniProt database.

Hence, we aligned the candidate immune peptide sequences from step 2 to the UniProt KB database (*reverse\_blast.sh*). Again, the e-value threshold was 1 and the number of target sequences in the output was limited to 50. This is similar to the rationale for reciprocal blast, and for this reason we refer to this step as reverse blast even though technically both step 3 and 4 are done in the same direction.

We refer to the BLASTp bit score values obtained in this search as the Reverse BLAST score.

## 5. Comparison of the Forward and Reverse BLAST scores

In theory, immune gene orthologues should align to the initial immune set (from step 1) and to the UniProt with similar bit scores, i.e. have similar Forward and Reverse scores, whereas non-orthologous sequences should be aligned with a higher score to their true orthologues present in Uniprot and hence have higher Reverse scores.

To determine whether it was possible to separate true orthologues by comparing forward and reverse scores we plotted forward against reverse (log)scores (*R script bl\_revision.R, functions.R see functions\_and\_R\_scripts.txt*). Since truncated orthologue sequences would still have similar forward and reverse scores (reflecting their identity), we also visualised the ratio of the alignment length to the Uniprot sequence length using alpha transparency values for points such that points reflecting alignments to non-truncated sequences (i.e. similar sequence length) appear as solid points.

## 6. Visual/manual examination of plots/hits

To verify the identity of candidate immune gene orthologues we used the *identify* function in R to examine the UniProt annotation of selected alignments. For most immune genes, orthologues were easily identifiable as they lied on/or very close to the forward = reverse score line and were aligned to a UniProt protein annotated as the desired immune gene orthologue. However, for some genes we observed multiple points on or close to this line (AP1M2, AP3M2, CTSS1/2), the UniProt annotation did not match with the selected gene (ERAP1, TAP1), or none of the points on the plot fitted our criteria (SEC61G, ERAP2). In this case, we chose several points that might represent an orthologue and examined their top 5 UniProt hits (*gene.hits.tsv*)

Supplementary Table 2

| Gene name | Orthologous predicted protein                                                                                                                     | Comments                                                                                             |
|-----------|---------------------------------------------------------------------------------------------------------------------------------------------------|------------------------------------------------------------------------------------------------------|
| AID       | NODE_3337_length_66067_cov_44.9838 GENSCAN_predicted_peptide_3 233_aa                                                                             | Top scoring UniProt hit belongs to correct gene                                                      |
| AP2M1     | NODE_326_length_249814_cov_47.6866 GENSCAN_predicted_peptide_14 1074_aa<br>NODE_6641_length_27025_cov_42.6987 GENSCAN_predicted_peptide_1 1026_aa | Top scoring UniProt hit of the first peptide and third of the second peptide belongs to correct gene |
| AP3M2     | NODE_11858_length_6461_cov_171.208 GENSCAN_predicted_peptide_1 405_aa                                                                             | Top scoring UniProt hit belongs to correct gene                                                      |
| B2m       | NODE_26321_length_534_cov_183.369 GENSCAN_predicted_peptide_1 92_aa                                                                               | Top scoring UniProt hit belongs to correct gene                                                      |
| BATF      | NODE_6109_length_31083_cov_52.3689 GENSCAN_predicted_peptide_2 251_aa                                                                             | Top scoring UniProt hit belongs to correct gene                                                      |
| CIITA     | NODE_2303_length_93200_cov_43.342 GENSCAN_predicted_peptide_4 1556_aa                                                                             | Top scoring UniProt hit belongs to correct gene                                                      |
| CTSS1     | NODE_2178_length_97347_cov_44.3687 GENSCAN_predicted_peptide_7 470_aa                                                                             | Top scoring UniProt hit belongs to correct gene                                                      |
| CTSS2     | NODE_969_length_161682_cov_49.7592 GENSCAN_predicted_peptide_5 404_aa                                                                             | Top scoring UniProt hit belongs to correct gene                                                      |
| HSP90     | NODE_170_length_315068_cov_45.2866 GENSCAN_predicted_peptide_20 709_aa                                                                            | Top scoring UniProt hit belongs to correct gene                                                      |
| LNPEP     | NODE_1284_length_138026_cov_45.1581 GENSCAN_predicted_peptide_8 971_aa                                                                            | Top scoring UniProt hit belongs to correct gene                                                      |
| RAG 1     | NODE_1604_length_120776_cov_52.7006 GENSCAN_predicted_peptide_2 1015_aa                                                                           | Top scoring UniProt hit belongs to correct gene                                                      |
| RAG 2     | NODE_1604_length_120776_cov_52.7006 GENSCAN_predicted_peptide_3 533_aa                                                                            | Top scoring UniProt hit belongs to correct gene                                                      |
| SEC61A1   | NODE_148_length_331228_cov_45.7995 GENSCAN_predicted_peptide_18 494_aa                                                                            | Top scoring UniProt hit belongs to correct gene                                                      |
| SEC61A1-2 | NODE_4460_length_48594_cov_76.0295 GENSCAN_predicted_peptide_1 454_aa                                                                             | Top scoring UniProt hit belongs to correct gene                                                      |
| SSR3      | NODE_3618_length_61353_cov_45.4674 GENSCAN_predicted_peptide_2 296_aa                                                                             | Top scoring UniProt hit belongs to correct gene                                                      |
| TAP2      | NODE_4645_length_46251_cov_64.2593 GENSCAN_predicted_peptide_5 875_aa                                                                             | Top scoring UniProt hit belongs to correct gene                                                      |
| TAPBP     | NODE_11231_length_7753_cov_428.536 GENSCAN_predicted_peptide_1 456_aa                                                                             | Top scoring UniProt hit belongs to correct gene                                                      |
| ERAP1     | NODE_1839_length_110210_cov_47.4795 GENSCAN_predicted_peptide_7 886_aa                                                                            | After examination, top UniProt hit belongs to correct gene                                           |
| AIRE      | NODE_2144_length_98088_cov_45.0458 GENSCAN_predicted_peptide_7 218_aa                                                                             | Second UniProt hit and two others belong to correct gene                                             |
| TAP1      | NODE_39_length_479181_cov_44.6292 GENSCAN_predicted_peptide_18 1443_aa                                                                            | Fusion prediction. Selected first part of the sequence                                               |
| AP1M2     | NODE_938_length_164357_cov_43.2764 GENSCAN_predicted_peptide_8 1716_aa                                                                            | Fusion prediction. Selected last part of the sequence                                                |
| ERAP2     | Unclear orthology due to too many paralogous aminopeptidases.                                                                                     | ?                                                                                                    |
| SEC61G    | See figure legend for detail.                                                                                                                     | Special case. See figure legend.                                                                     |

## Supplementary Table 2

The table includes identifiers of the predicted peptides (column 2) that we consider to be orthologues to the target set of immune genes (column 1). Column 3 contains short comments on how this gene was identified. For most genes, the top blast hit lying on the X=Y line corresponded clearly to a UniProt protein annotated as the respective target gene. However, for some genes we had to examine the annotation of additional hits, due to non-informative description of the top hit, e.g. in the case of AIRE the top UniProt hit was described as Chromosome\_15\_SCAF14992. In addition, some predicted peptides combined products from two adjacent genes (Fusion prediction). For these genes the alignment coordinates had to be examined. The predicted protein sequences can be found in *esm\_pisc\_pep.fasta* and a summary of the blast output for selected points is provided in *gene.hits.tsv*.

SEC61G of *L. piscatorius* was a special case. Although SEC61G is a highly conserved gene, it is short and one exon primarily contains low-complexity sequence. This results in alignments to the second exon having low BLAST scores leading to its exclusion from the gene prediction and resulting in a truncated protein sequence. However, a manual examination of the BLAST output clearly demonstrated that complete sequence was aligned with a high sequence similarity (but low score). Similarly, running BLAST with ‘-dust no’ provided the full alignment with a high alignment score. It is notable that SEC61G is one of the genes that Malmstrøm et al. failed to identify in a number of species.

## 7. Unassembled reads search

Protein sequences from genes for which we failed to identify *L. piscatorius* orthologues with the Forward/Reverse BLAST strategy were used in a tBLASTn search of the unassembled read pools. In this case, we included both Illumina and SOLiD reads. Reads that were aligned to the missing protein sequences were re-assembled with CLC Genomics Workbench. The resulting contigs were aligned to the NCBI nr database with BLASTn. If this approach failed to identify missing orthologues, we aligned selected unassembled reads to the NCBI nr database. After this, we reported orthologues that we failed to identify as actually missing.

## Construction of phylogenetic trees

All sequences were obtained from genbank (see accession numbers in the section below). Then, mitogenomes were split by gene according to their annotations. First, each protein coding gene, each tRNA and rRNA were aligned separately with T-Coffee [9]. Then, alignments were trimmed from the ends, to remove end gaps and sequences were concatenated into new mitogenome sequences for all species. Datasets were partitioned by the first, second and third codon positions for protein coding genes, then rRNA and tRNA were put as separate partitions. To construct the trees we used RaxML [1] using the GTR GAMMA model with 500 rapid bootstrap (-f a option) iterations.

## Sequences used to construct the trees:

### Polymixiidae

NC\_002648 *Polymixia japonica*

### Tetraodontiformes

GQ409967 *Takifugu fasciatus*

KJ562276 *Takifugu flavidus*

### Syngnathiformes

KJ184525 *Syngnathoides biaculeatus*

KU925872 *Syngnathus typhle*

KJ184524 *Solegnathus hardwickii*

AP012309 *Doryrhamphus japonicus*

AP013027 *Hippocampus histrix*

KJ184528 *Trachyrhamphus serratus*

KP861226 *Syngnathus schlegeli*

JX970973 *Hippocampus comes*

NC\_010272 *Hippocampus kuda*

NC\_022722 *Hippocampus erectus*

KJ139455 *Corythoichthys flavofasciatus*

### Gadiformes

AP018148 *Gadiculus argenteus thori*

X99772 *Gadus morhua*

KC844053 *Lota lota*

NC\_008225 *Ventrifossa garmani*

NC\_015102 *Micromesistius poutassou*

NC\_004377 *Physiculus japonicus*

NC\_015094 *Pollachius virens*

NC\_010122 *Arctogadus glacialis*

NC\_015120 *Merluccius merluccius*

NC\_010121 *Boreogadus saida*

NC\_008224 *Trachyrincus murrayi*

NC\_008222 *Bathygadus antrodes*

NC\_008124 *Bregmaceros nectabanus*

## Lophiiformes

|           |                                    |
|-----------|------------------------------------|
| AB282831  | <i>Tetrabrachium ocellatum</i>     |
| AB282828  | <i>Antennarius striatus</i>        |
| AP005977  | <i>Halieutaea stellata</i>         |
| AB282837  | <i>Neoceratias spinifer</i>        |
| AB282847  | <i>Thaumatichthys pagidostomus</i> |
| AB282836  | <i>Caulophryne pelagica</i>        |
| AB282830  | <i>Antennatus coccineus</i>        |
| AB282841  | <i>Bufoceratias thele</i>          |
| AB282842  | <i>Diceratias pileatus</i>         |
| AB282827  | <i>Sladenia gardineri</i>          |
| AB282855  | <i>Acentrophryne dolichonema</i>   |
| AB282854  | <i>Linophryne bicornis</i>         |
| AB282840  | <i>Himantolophus groenlandicus</i> |
| AB282829  | <i>Histrio histrio</i>             |
| AB282849  | <i>Centrophryne spinulosa</i>      |
| AB282839  | <i>Himantolophus albinares</i>     |
| AB282835  | <i>Zalieutes elater</i>            |
| AB282826  | <i>Lophiodes caularis</i>          |
| AP005978  | <i>Malthopsis jordani</i>          |
| AB282833  | <i>Chaunax pictus</i>              |
| AB282838  | <i>Melanocetus johnsonii</i>       |
| AB282834  | <i>Coelophrys brevicaudata</i>     |
| AB282845  | <i>Chaenophryne melanorhabdus</i>  |
| AB282843  | <i>Oneirodes thompsoni</i>         |
| AB282846  | <i>Bertella idiomorpha</i>         |
| AB282844  | <i>Puck pinnata</i>                |
| AB282851  | <i>Ceratias uranoscopus</i>        |
| AB282850  | <i>Cryptopsaras couesii</i>        |
| NC_004383 | <i>Caulophryne jordani</i>         |
| MF994812  | <i>Lophius piscatorius</i>         |
| KJ020931  | <i>Lophius litulon</i>             |

## Sources.

1. Stamatakis A. 2014 RAxML version 8: a tool for phylogenetic analysis and post-analysis of large phylogenies. *Bioinformatics* 30, 1312–1313. (doi:10.1093/bioinformatics/btu033)
2. Martin M. 2011 Cutadapt removes adapter sequences from high-throughput sequencing reads. *EMBnet.journal* 17, 10–12. (doi:10.14806/ej.17.1.200)
3. Magoc T, Salzberg SL. 2011 FLASH: fast length adjustment of short reads to improve genome assemblies. *Bioinformatics* 27, 2957–2963. (doi:10.1093/bioinformatics/btr507)
4. Bankevich A et al. 2012 SPAdes: A New Genome Assembly Algorithm and Its Applications to Single-Cell Sequencing. *J. Comput. Biol.* 19, 455–477. (doi:10.1089/cmb.2012.0021)
5. Gurevich A, Saveliev V, Vyahhi N, Tesler G. 2013 QUAST: quality assessment tool for genome assemblies. *Bioinformatics* 29, 1072–1075. (doi:10.1093/bioinformatics/btt086)
6. Waterhouse RM, Seppey M, Simão FA, Manni M, Ioannidis P, Klioutchnikov G, Kriventseva EV, Zdobnov EM. 2018 BUSCO Applications from Quality Assessments to Gene Prediction and Phylogenomics. *Mol. Biol. Evol.* 35, 543–548. (doi:10.1093/molbev/msx319)
7. Marçais G, Kingsford C. 2011 A fast, lock-free approach for efficient parallel counting of occurrences of k-mers. *Bioinformatics* 27, 764–770. (doi:10.1093/bioinformatics/btr011)
8. Malmstrøm M et al. 2016 Evolution of the immune system influences speciation rates in teleost fishes. *Nat. Genet.* 48, 1204–1210. (doi:10.1038/ng.3645)
9. Notredame C, Higgins DG, Heringa J. 2000 T-coffee: a novel method for fast and accurate multiple sequence alignment 1 Edited by J. Thornton. *J. Mol. Biol.* 302, 205–217. (doi:10.1006/jmbi.2000.4042)
10. Burge C, Karlin S. 1997 Prediction of complete gene structures in human genomic DNA. *J. Mol. Biol.* 268, 78–94. (doi:10.1006/jmbi.1997.0951)
